# Supplementary material for: MOF-templated nanorice–nanosheet core–satellite iron dichalcogenides by heterogeneous sulfuration for high-performance lithium ion batteries
Source: Royal Society of Chemistry journal article supplement (doi:10.1039/c6ta09060e), 2016-01-01
Supplement: c6ta09060e1.pdf [file c6ta09060e1.pdf]

## Supporting Information for

# MOF-Templated Nanorice-Nanosheet Core-Satellite Iron Dichalcogenides by Heterogeneous Sulfuration for High- Performance Lithium Ion Batteries

Huicong Pang<sup>†</sup>, Weiwei Sun<sup>†</sup>, Li-Ping Lv, Feiying Jin and Yong Wang\*

*Department of Chemical Engineering, School of Environmental and Chemical  
Engineering, Shanghai University, Shangda Road 99, Shanghai, P. R. China, 200444*

\*Corresponding authors: Tel: +86-21-66137723; fax: +86-21-66137725.

Email address: [yongwang@shu.edu.cn](mailto:yongwang@shu.edu.cn)

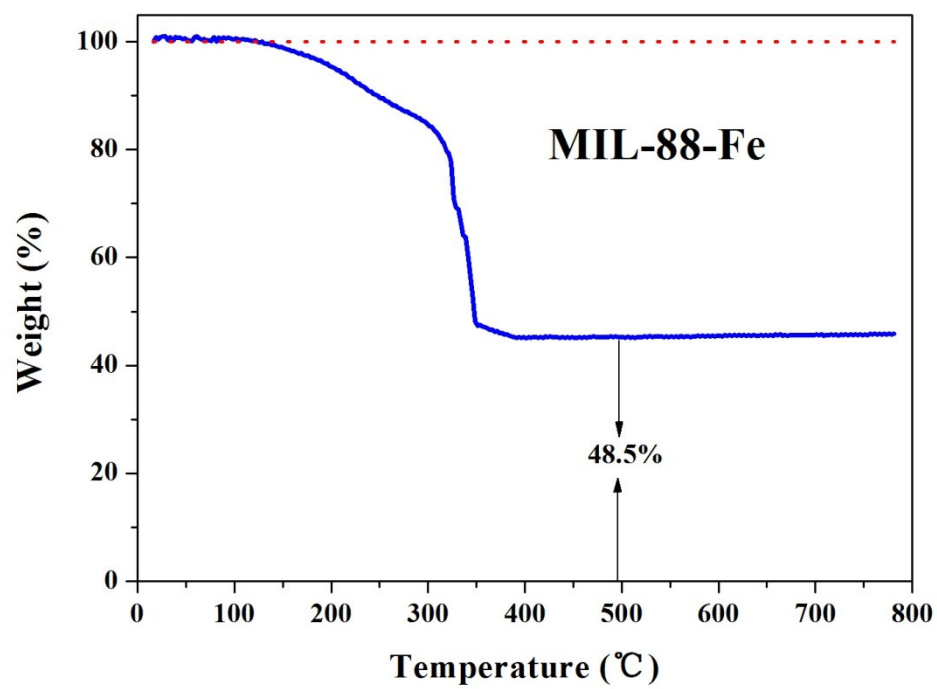

Fig. S1 TGA curve of MIL-88-Fe

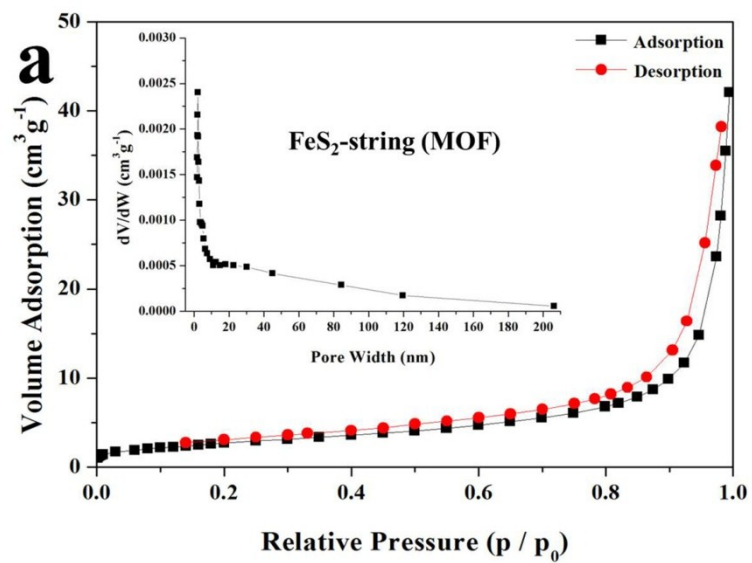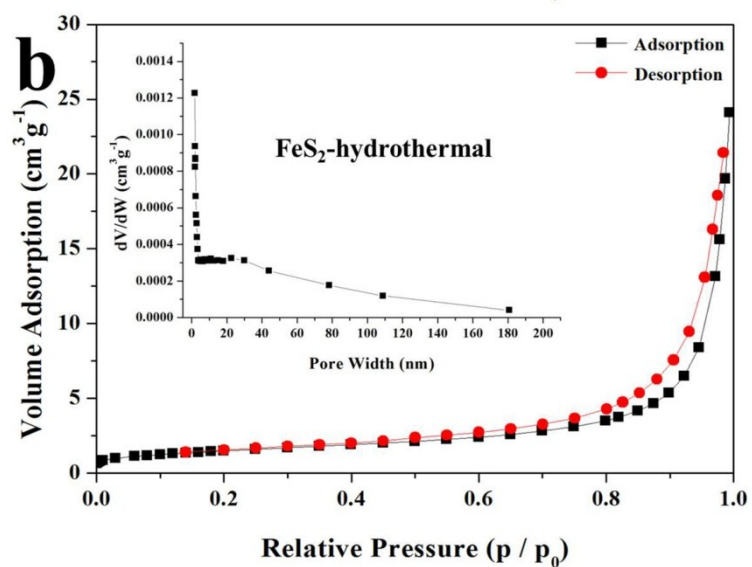

Fig. S2 Nitrogen adsorption isotherms of (a) FeS<sub>2</sub>-string (MOF) and (b) FeS<sub>2</sub>-hydrothermal

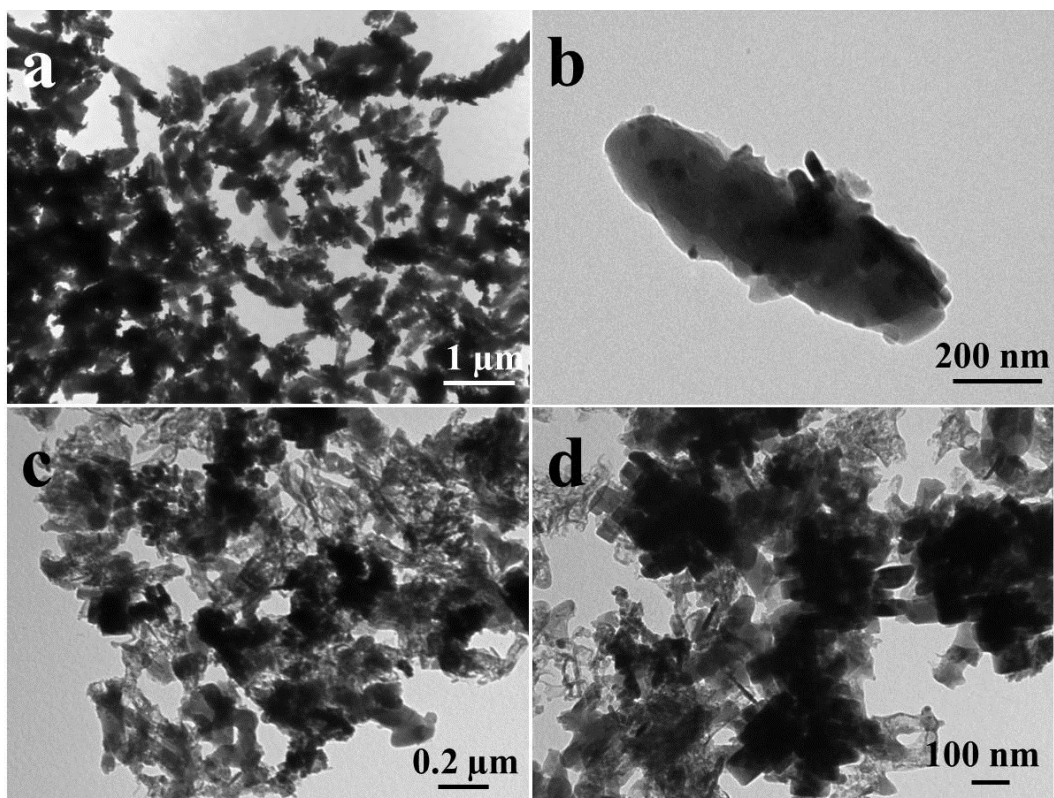

Fig. S3 TEM images of FeS<sub>2</sub> products with different ratios of the MOF intermediate and sulfur: (a-b) 1 : 2.5, (c-d) 1 : 10.

**Table S1.** Electrochemical property comparison between FeS<sub>2</sub>@C of this work and previous relative reports.

| Material            | FeS <sub>2</sub>                                        | Electrochemical Performances<br>(charge capacity refers to the lithium extraction capacity)                                                                                    | Reference |
|---------------------|---------------------------------------------------------|--------------------------------------------------------------------------------------------------------------------------------------------------------------------------------|-----------|
|                     | Morphology                                              |                                                                                                                                                                                |           |
| FeS <sub>2</sub> @C | Nanorice-nanosheet core-satellite with carbon overlayer | An initial charge capacity of 1256.3 mA h g <sup>-1</sup> and the retained capacity of 1336.5 mA h g <sup>-1</sup> after 200 cycles.<br>(100 mA g <sup>-1</sup> , 0.005-3.0 V) | This work |
| FeS <sub>2</sub>    | Nanoparticle                                            | An initial charge capacity of ~580 mA h g <sup>-1</sup> and the retained capacity of ~600 mA h g <sup>-1</sup> after 100 cycles.<br>(100 mA g <sup>-1</sup> , 0.005-3.0 V)     | 13        |
| FeS <sub>2</sub>    | Nanoparticle                                            | An initial charge capacity of ~580 mA h g <sup>-1</sup> and the retained capacity of ~400 mA h g <sup>-1</sup> after 30 cycles.<br>(89 mA g <sup>-1</sup> , 1.2-2.6 V)         | 14        |
| FeS <sub>2</sub>    | Nanoparticle                                            | An initial charge capacity of ~590 mA h g <sup>-1</sup> and the retained capacity of ~480 mA h g <sup>-1</sup> after 50 cycles<br>(89 mA g <sup>-1</sup> , 1.0-3.0 V)          | 15        |
| FeS <sub>2</sub>    | Nanoparticle                                            | An initial charge capacity of ~500 mA h g <sup>-1</sup> and the retained capacity of ~360 mA h g <sup>-1</sup> after 30 cycles.<br>(100 mA g <sup>-1</sup> , 0.001-3.0 V)      | 16        |
| FeS <sub>2</sub>    | Nanoparticle                                            | An initial charge capacity of ~810 mA h g <sup>-1</sup> and the retained capacity of ~420 mA h g <sup>-1</sup> after 40 cycles.<br>(89 mA g <sup>-1</sup> , 0.8-2.4 V)         | 17        |
| FeS <sub>2</sub>    | Hollow microsphere                                      | An initial charge capacity of ~820 mA h g <sup>-1</sup> and the retained capacity of ~537 mA h g <sup>-1</sup> after 30 cycles.<br>(178 mA g <sup>-1</sup> , 1.0-2.5 V)        | 18        |
| FeS <sub>2</sub>    | Nanocube                                                | An initial charge capacity of ~650 mA h g <sup>-1</sup> and the retained capacity of ~540 mA h g <sup>-1</sup> after 150 cycles.<br>(1000 mA g <sup>-1</sup> , 0.001-3.0 V)    | 19        |
| FeS <sub>2</sub>    | Nanowire                                                | An initial charge capacity of 409 mA h g <sup>-1</sup> and the retained capacity of 350 mA h g <sup>-1</sup> after 50 cycles.<br>(89 mA g <sup>-1</sup> , 1.1-2.4 V)           | 20        |

|                                |                                                |                                                                                                                                                                           |    |
|--------------------------------|------------------------------------------------|---------------------------------------------------------------------------------------------------------------------------------------------------------------------------|----|
| FeS <sub>2</sub> @C            | Nanoparticle in carbon                         | An initial charge capacity of ~620 mA h g <sup>-1</sup> and the retained capacity of ~490 mA h g <sup>-1</sup> after 50 cycles.<br>(45 mA g <sup>-1</sup> , 1.2-2.6 V)    | 21 |
| FeS <sub>2</sub> @CNT          | Nanoparticle in carbon nanotube                | An initial charge capacity of ~690 mA h g <sup>-1</sup> and the retained capacity of ~800 mA h g <sup>-1</sup> after 200 cycles.<br>(200 mA g <sup>-1</sup> , 0.01-3.0 V) | 22 |
| FeS <sub>2</sub> /carbon fiber | Nanoparticle on carbon fiber                   | An initial charge capacity of 1382 mA h g <sup>-1</sup> and the retained capacity of ~680 mA h g <sup>-1</sup> after 100 cycles.<br>(100 mA g <sup>-1</sup> , 0.01-3.0 V) | 23 |
| FeS <sub>2</sub> /Graphene     | Nanoparticle on graphene                       | An initial charge capacity of 923 mA h g <sup>-1</sup> and the retained capacity of ~1000 mA h g <sup>-1</sup> after 80 cycles.<br>(89 mA g <sup>-1</sup> , 0.005-3.0 V)  | 24 |
| FeS <sub>2</sub> /Graphene     | Microsphere on graphene                        | An initial charge capacity of ~750 mA h g <sup>-1</sup> and the retained capacity of ~950 mA h g <sup>-1</sup> after 300 cycles.<br>(890 mA g <sup>-1</sup> , 0.01-3.0 V) | 25 |
| FeS <sub>2</sub> @C            | Microsphere with carbon overlayer              | An initial charge capacity of ~860 mA h g <sup>-1</sup> and the retained capacity of ~440 mA h g <sup>-1</sup> after 50 cycles.<br>(250 mA g <sup>-1</sup> , 1.0-2.6 V)   | 26 |
| FeS <sub>2</sub> /Graphene     | Nanocube on graphene                           | An initial charge capacity of 1147 mA h g <sup>-1</sup> and the retained capacity of 1001 mA h g <sup>-1</sup> after 60 cycles.<br>(100 mA g <sup>-1</sup> , 0.01-3.0 V)  | 27 |
| FeS <sub>2</sub> @C            | Nanowire with carbon overlayer                 | An initial charge capacity of 657 mA h g <sup>-1</sup> and the retained capacity of 560 mA h g <sup>-1</sup> after 100 cycles.<br>(100 mA g <sup>-1</sup> , 1.0-3.0 V)    | 28 |
| Co/FeS <sub>2</sub> @C         | Nanoflake with carbon overlayer on Co nanowire | An initial charge capacity of ~750 mA h g <sup>-1</sup> and the retained capacity of ~530 mA h g <sup>-1</sup> after 70 cycles.<br>(222.5 mA g <sup>-1</sup> , 1.2-2.6 V) | 29 |
| FeS <sub>2</sub> @C            | Nanooctahedra with carbon overlayer            | An initial charge capacity of 566 mA h g <sup>-1</sup> and the retained capacity of ~470 mA h g <sup>-1</sup> after 50 cycles.<br>(447 mA g <sup>-1</sup> , 1.0-3.0 V)    | 30 |
